# Supplementary material for: Enzyme kinetics from circular dichroism of insulin reveals mechanistic insights into the regulation of insulin-degrading enzyme
Source: PubMed Central journal article supplement (PMC6239264; doi:10.1042/bsr20181416), 2018-11-07
Supplement: bsr20181416_Supp1.pdf [file bsr20181416_Supp1.pdf]

Supporting Information for

**Enzyme Kinetics from Circular Dichroism of Insulin Reveals Mechanistic Insights  
into the Regulation of Insulin-degrading Enzyme**

Valerie A. Ivancic, Claire A. Krasinski, Qiuchen Zheng, Rebecca J. Meservier,  
Donald E. Spratt, and Noel D. Lazo\*

Carlson School of Chemistry and Biochemistry, Clark University, 950 Main Street, Worcester, Massachusetts  
01610, United States

\*nlazo@clarku.edu

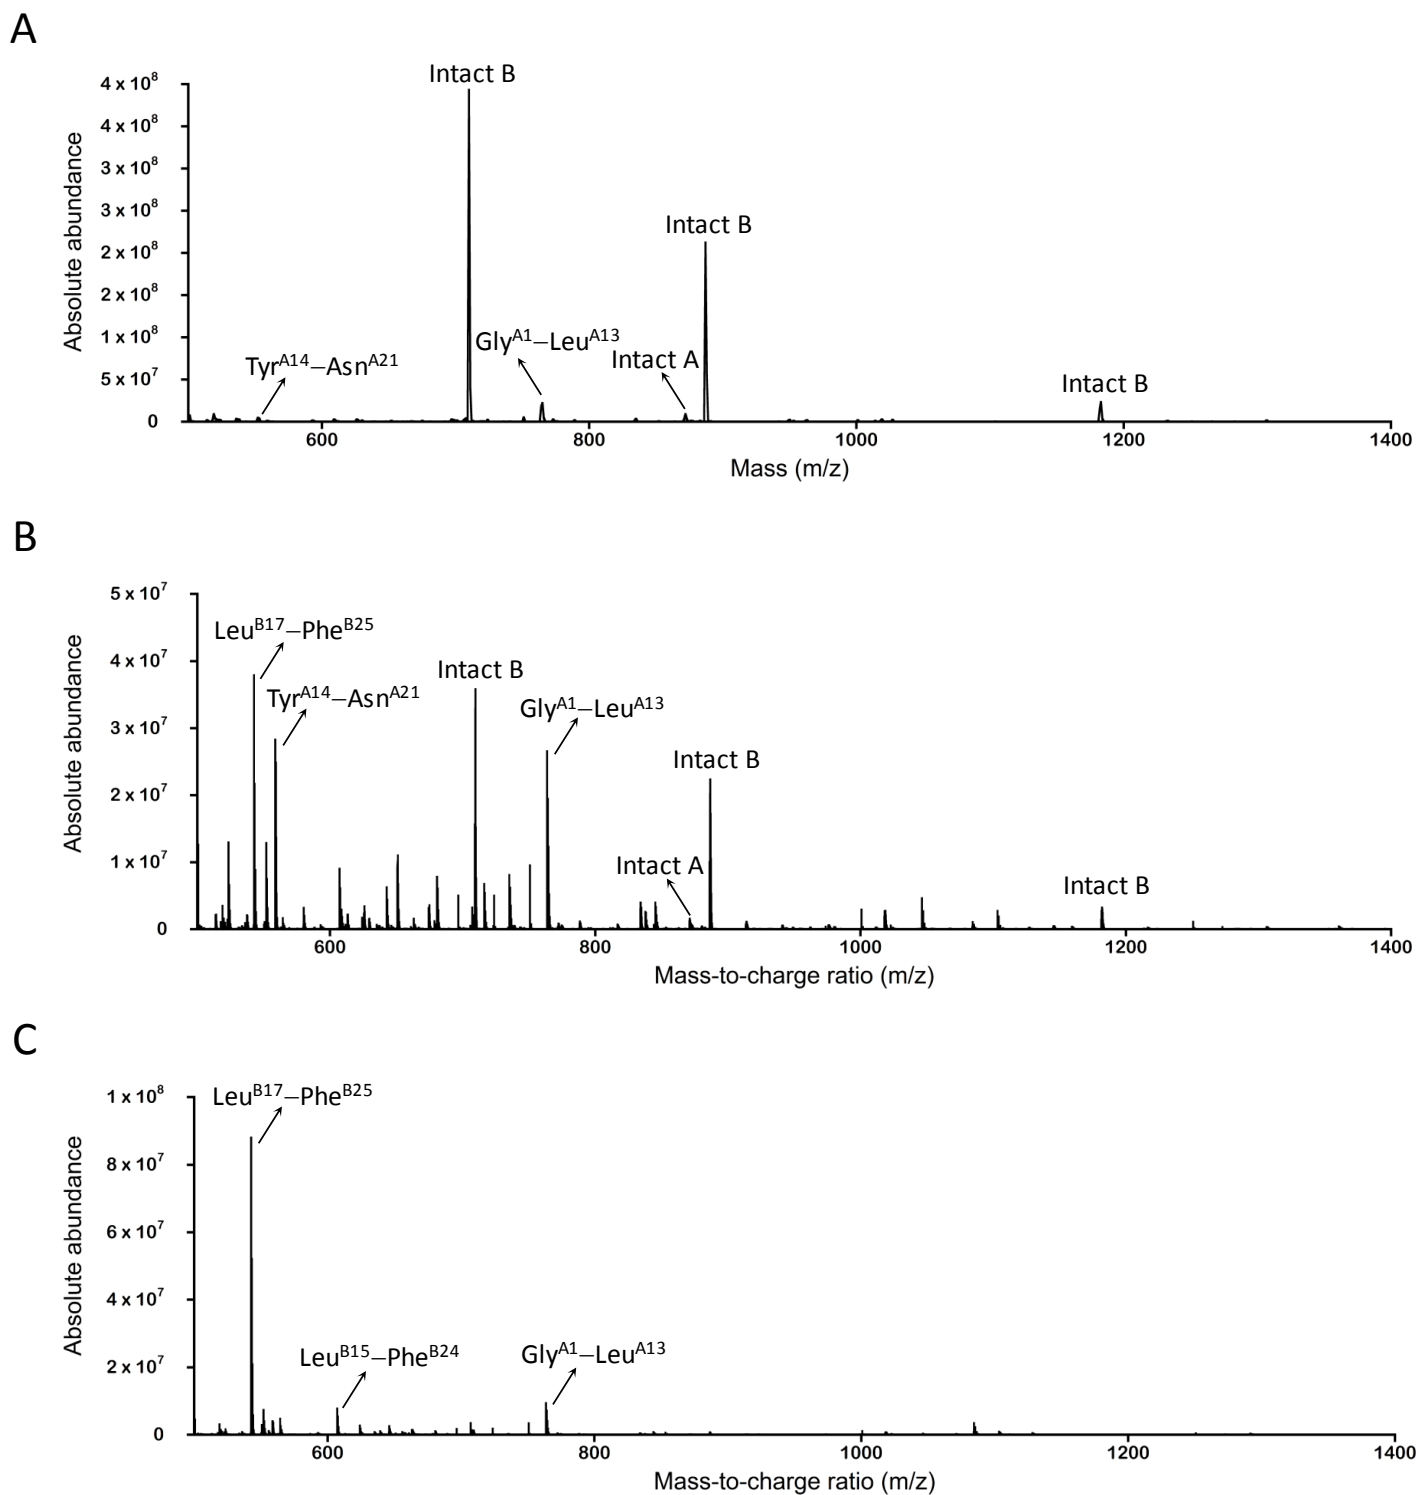

**Figure S1.** Proteolysis of insulin by IDE at 37 °C. Insulin (100  $\mu$ M in 50 mM Tris buffer, pH 7.4) was digested by IDE using a substrate-to-enzyme molar ratio of 100:1. Quenched digests were reduced and alkylated for the unambiguous identification of products by mass spectrometry. (A) Mass spectrum of the 1-minute digest. Peaks corresponding to intact A, intact B and fragments due to the cleavage of the peptide bond between Leu<sup>A13</sup> and Tyr<sup>A14</sup> were detected. (B) Mass spectrum of the 3-hour digest. Peaks corresponding to intact A, intact B, and short fragments of the A and B chains were detected. (C) Mass spectrum of the 24-hour digest. No peak corresponding to intact A or intact B was observed indicating complete digestion of insulin.

**Table S1.** Chains and dominant fragments detected in the mass spectra of insulin digests.\*

| Chain or Fragment                                 | Observed Mass (Da) | Theoretical Mass (Da) | $\delta^{**}$ (Da) |
|---------------------------------------------------|--------------------|-----------------------|--------------------|
| <b>A. 1-minute digestion</b>                      |                    |                       |                    |
| Intact A (Gly <sup>A1</sup> –Asn <sup>A21</sup> ) | 2382.12            | 2382.00               | 0.12               |
| Intact B (Phe <sup>B1</sup> –Thr <sup>B30</sup> ) | 3427.80            | 3427.69               | 0.11               |
| Gly <sup>A1</sup> –Leu <sup>A13</sup>             | 1354.68            | 1354.60               | 0.08               |
| Tyr <sup>A14</sup> –Asn <sup>A21</sup>            | 1045.46            | 1045.42               | 0.04               |
| <b>B. 3-hour digestion</b>                        |                    |                       |                    |
| Intact A (Gly <sup>A1</sup> –Asn <sup>A21</sup> ) | 2382.12            | 2382.00               | 0.12               |
| Intact B (Phe <sup>B1</sup> –Thr <sup>B30</sup> ) | 3427.80            | 3427.69               | 0.11               |
| Gly <sup>A1</sup> –Ser <sup>A12</sup>             | 1241.58            | 1241.51               | 0.07               |
| Leu <sup>A13</sup> –Asn <sup>A21</sup>            | 1158.54            | 1158.50               | 0.04               |
| Gly <sup>A1</sup> –Leu <sup>A13</sup>             | 1354.68            | 1354.60               | 0.08               |
| Tyr <sup>A14</sup> –Asn <sup>A21</sup>            | 1045.46            | 1045.42               | 0.04               |
| Phe <sup>B1</sup> –Ser <sup>B9</sup>              | 1003.50            | 1003.46               | 0.04               |
| His <sup>B10</sup> –Thr <sup>B30</sup>            | 2442.27            | 2442.24               | 0.03               |
| Phe <sup>B1</sup> –His <sup>B10</sup>             | 1140.57            | 1140.52               | 0.05               |
| Leu <sup>B11</sup> –Thr <sup>B30</sup>            | 2305.23            | 2305.18               | 0.05               |
| Phe <sup>B1</sup> –Glu <sup>B13</sup>             | 1481.76            | 1481.71               | 0.05               |
| Ala <sup>B14</sup> –Thr <sup>B30</sup>            | 1964.02            | 1963.99               | 0.03               |
| Phe <sup>B1</sup> –Ala <sup>B14</sup>             | 1552.80            | 1552.75               | 0.05               |
| Leu <sup>B15</sup> –Thr <sup>B30</sup>            | 1892.98            | 1892.95               | 0.03               |
| Phe <sup>B1</sup> –Leu <sup>B15</sup>             | 1665.86            | 1665.83               | 0.03               |
| Tyr <sup>B16</sup> –Thr <sup>B30</sup>            | 1779.90            | 1779.87               | 0.03               |
| Phe <sup>B1</sup> –Tyr <sup>B16</sup>             | 1828.95            | 1828.90               | 0.05               |
| Leu <sup>B17</sup> –Thr <sup>B30</sup>            | 1616.84            | 1616.80               | 0.04               |
| Phe <sup>B1</sup> –Gly <sup>B20</sup>             | 2201.14            | 2201.08               | 0.06               |
| Glu <sup>B21</sup> –Thr <sup>B30</sup>            | 1244.64            | 1244.62               | 0.02               |
| Phe <sup>B1</sup> –Gly <sup>B23</sup>             | 2543.32            | 2543.24               | 0.08               |
| Phe <sup>B24</sup> –Thr <sup>B30</sup>            | 902.46             | 902.46                | 0.00               |
| <b>C. 24-hour digestion</b>                       |                    |                       |                    |
| Gly <sup>A1</sup> –Leu <sup>A13</sup>             | 1354.68            | 1354.60               | 0.08               |
| Leu <sup>B17</sup> –Phe <sup>B25</sup>            | 1026.54            | 1027.21               | -0.67              |
| Leu <sup>B15</sup> –Phe <sup>B24</sup>            | 1155.62            | 1156.36               | -0.74              |

\* 100  $\mu$ M insulin in 50 mM Tris buffer, pH 7.4, 37 °C, substrate to enzyme molar ratio of 100:1\*\* $\delta$  = Observed Mass – Theoretical Mass



**Table S2.** Steady-state kinetic parameters for the degradation of insulin by IDE at pH 7.4 and 37 °C determined from Lineweaver-Burk plots.

| Regulator                                                   | $K_M$ (M)                     | $k_{cat}$ ( $s^{-1}$ ) | $k_{cat}/K_M$ ( $M^{-1}s^{-1}$ ) |
|-------------------------------------------------------------|-------------------------------|------------------------|----------------------------------|
| None                                                        | $2.7 \pm 0.16 \times 10^{-5}$ | $0.054 \pm 0.001$      | $2.0 \pm 0.08 \times 10^3$       |
| 1 mM ATP                                                    | $3.8 \pm 0.18 \times 10^{-5}$ | $0.062 \pm 0.001$      | $1.6 \pm 0.06 \times 10^3$       |
| 1 mM ATP <sub>P</sub> <sup>+</sup><br>1 mM Mg <sup>2+</sup> | $2.4 \pm 0.05 \times 10^{-5}$ | $0.046 \pm 0.002$      | $1.9 \pm 0.09 \times 10^3$       |

<sup>1</sup>Values are the means  $\pm$  SD from three trials.

**Table S3.** Steady-state kinetic parameters for the degradation of insulin by IDE at pH 7.4 and 37 °C determined from Hanes-Woolf plots.

| Regulator                                                   | $K_M$ (M)                     | $k_{cat}$ ( $s^{-1}$ ) | $k_{cat}/K_M$ ( $M^{-1}s^{-1}$ ) |
|-------------------------------------------------------------|-------------------------------|------------------------|----------------------------------|
| None                                                        | $1.9 \pm 0.09 \times 10^{-5}$ | $0.047 \pm 0.001$      | $2.5 \pm 0.07 \times 10^3$       |
| 1 mM ATP                                                    | $3.1 \pm 0.2 \times 10^{-5}$  | $0.056 \pm 0.002$      | $1.8 \pm 0.08 \times 10^3$       |
| 1 mM ATP <sub>P</sub> <sup>+</sup><br>1 mM Mg <sup>2+</sup> | $2.1 \pm 0.09 \times 10^{-5}$ | $0.044 \pm 0.001$      | $2.1 \pm 0.06 \times 10^3$       |

<sup>1</sup>Values are the means  $\pm$  SD from three trials.
